# Supplementary material
Source: MDPI journal article supplement (https://www.mdpi.com/2227-9717/11/2/361)
Supplement: s1 [file s1]

**Table S1.** Data on  $E_{1/2}$  ORR catalysts from the literature.

| Catalyst                                                | $E_{1/2}$ (V vs. RHE) | Application | Electrolyte                          | Ref.  |
|---------------------------------------------------------|-----------------------|-------------|--------------------------------------|-------|
| Fe-SAs@NCTCs                                            | 0.91                  | ORR         | 0.1 M KOH                            | [53]  |
| Fe-N-C                                                  | 0.85 V                | ORR         | 0.5 M H <sub>2</sub> SO <sub>4</sub> | [56]  |
| Ti <sub>3</sub> C <sub>2</sub> MXene                    | 0.92                  | ORR         | 0.1 M KOH                            | [59]  |
| Fe/S <sub>2</sub> -NC                                   | 0.91                  | ORR         | 0.1 M KOH                            | [69]  |
| Cu-SA/SNC                                               | 0.893                 | ORR         | 0.1 M KOH                            | [73]  |
| CuSACs                                                  | 0.81                  | ORR         | 0.1 M KOH                            | [74]  |
| Cu-SACs                                                 | 0.895                 | ORR         | 0.1 M KOH                            | [75]  |
| Cu-NGS                                                  | 0.81                  | ORR         | 0.1 M KOH                            | [76]  |
| Mn/C-NO                                                 | 0.86                  | ORR         | 0.1 M KOH                            | [77]  |
| S-Cu-ISA/SNC                                            | 0.918                 | ORR         | 0.1 M KOH                            | [79]. |
| Mn-N-C                                                  | 0.800                 | ORR         | 0.5 M H <sub>2</sub> SO <sub>4</sub> | [80]  |
| Mn@NG                                                   | 0.82                  | ORR         | 0.1 M KOH                            | [83]  |
| Zn-N-C-1                                                | 0.873                 | ORR         | 0.1 M KOH                            | [86]. |
| 20Co-NC-1100                                            | 0.80                  | ORR         | 0.1 M HClO <sub>4</sub>              | [91]  |
| W-N-C                                                   | 0.88                  | ORR         | 0.1 M KOH                            | [93]  |
| Cr/N/C-950                                              | 0.773                 | ORR         | 0.1 M HClO <sub>4</sub>              | [94]  |
| Mg-SACs                                                 | 0.91                  | ORR         | 0.1 M KOH                            | [96]  |
| O-Zr-N-C                                                | 0.91                  | ORR         | 0.1 M KOH                            | [104] |
| N-Fe <sub>2</sub> MoC-GC                                | 0.887                 | ORR         | 0.1 M KOH                            | [118] |
| Mn-Fe-N/S@mC                                            | 0.896                 | ORR         | 0.1 M KOH                            | [119] |
| Co <sub>2</sub> /Fe-N@CHC                               | 0.915                 | ORR         | 0.1 M KOH                            | [136] |
| Ru-N/G                                                  | 0.75                  | ORR         | 0.1 M HClO <sub>4</sub>              | [145] |
| Ru-SSC                                                  | 0.824                 | ORR         | 0.1 M HClO <sub>4</sub>              | [146] |
| IrSACs                                                  | 0.831                 | ORR         | 0.1 M HClO <sub>4</sub>              | [147] |
| BCICNTs                                                 | 0.84                  | ORR         | 0.1 M KOH                            | [174] |
| GH-BGQD <sub>2</sub>                                    | 0.87                  | ORR/OER/HER | 0.1 M KOH                            | [175] |
| NCNT-10                                                 | 0.82                  | ORR         | 0.1 M KOH                            | [179] |
| NOSC <sub>8</sub> -900                                  | 0.74                  | ORR         | 0.1 M KOH                            | [182] |
| S-N-C                                                   | 0.835                 | ORR         | 0.1 M KOH                            | [184] |
| ECN-950                                                 | 0.97                  | ORR         | 0.1 M NaOH                           | [194] |
| D-NSOC                                                  | 0.81                  | ORR/OER     | 0.1 M KOH                            | [198] |
| Pd <sub>3</sub> Co-BMOF                                 | 0.977                 | ORR         | 0.1 M KOH                            | [206] |
| MIL-101@ZIF-67                                          | 0.86                  | ORR         | 0.1 M KOH                            | [207] |
| Fe <sub>1</sub> Co <sub>2</sub> -NC                     | 0.88                  | ORR         | 0.1 M KOH                            | [210] |
| Fe <sub>2</sub> Co <sub>2</sub> Ni <sub>2</sub> /N-CNT  | 0.749                 | ORR         | 0.1 M KOH                            | [232] |
| FeCoNiCuPd-HEANP                                        | 0.90                  | ORR         | 0.1 M KOH                            | [274] |
| PdCuMoNiCoNHS/RGO <sub>3</sub> -CNT                     | 0.86                  | ORR         | 0.1 M KOH                            | [275] |
| HESACs (FeCoNiCuMn)                                     | 0.887 V               | ORR         | 0.1 M KOH                            | [280] |
| (3DOM) Co <sub>3</sub> O <sub>4</sub>                   | 0.839                 | ORR/OER     | 0.1 M KOH                            | [289] |
| Co <sub>3</sub> O <sub>4</sub> (x)/Ism-TiO <sub>2</sub> | 0.70                  | ORR/OER     | 0.1 M KOH                            | [297] |
| Co <sub>9</sub> S <sub>8</sub> -N-C                     | 0.70                  | ORR         | 0.1 M NaOH                           | [315] |
| VO <sub>x</sub> N <sub>y</sub> -CNTs                    | 0.77                  | ORR         | 0.1 M KOH                            | [318] |
| Co <sub>2</sub> N/CoP@PNCNTs                            | 0.85                  | ORR         | 0.1 M KOH                            | [319] |
| Fe <sub>3</sub> C@NCNF-900                              | 0.342                 | ORR         | 0.1 M HClO <sub>4</sub>              | [322] |
| P-O/FeN <sub>4</sub> -CNS                               | 0.89                  | ORR         | 0.1 M KOH                            | [323] |
| YF <sub>3</sub> @NC                                     | 0.836                 | ORR         | 0.1 M KOH                            | [328] |
